# Supplementary material for: Epidemiology of hepatitis B, C and D in Malawi: systematic review
Source: Springer Nature journal article supplement (doi:10.1186/s12879-018-3428-7), 2018-10-12
Supplement: MOESM1 [file 16195128]

## SUPPLEMENTARY TABLE 1: SEARCH STRATEGIES

**Limits:** Publication date: 1 January 1990 to 22 June 2018

No language restriction

|                                                                                                                                                                                                                                                                                                                                                                                                                                                                                         |
|-----------------------------------------------------------------------------------------------------------------------------------------------------------------------------------------------------------------------------------------------------------------------------------------------------------------------------------------------------------------------------------------------------------------------------------------------------------------------------------------|
| <b>PUBMED</b> ( <a href="https://www.ncbi.nlm.nih.gov/pubmed/">https://www.ncbi.nlm.nih.gov/pubmed/</a> )                                                                                                                                                                                                                                                                                                                                                                               |
| ((Malawi AND (hepatitis B[MeSH] or hepatitis C[MeSH] or hepatitis D[MeSH] or Hepatitis, Viral, Human[MeSH] or hepatitis or HBV or HBsAg or or HCV or anti-HCV or HCV antibody or core HCV antigen or HCVcAg or HCV RNA or HDV or anti-HD or anti-HDV or HDV IgG or viral hepatitis)))                                                                                                                                                                                                   |
| <b>SCOPUS</b> ( <a href="https://www.scopus.com/">https://www.scopus.com/</a> )                                                                                                                                                                                                                                                                                                                                                                                                         |
| TITLE-ABS-KEY(malawi) AND (TITLE-ABS-KEY (hepatitis B) OR TITLE-ABS-KEY (hepatitis C) OR TITLE-ABS-KEY (hepatitis D) or TITLE-ABS-KEY (Hepatitis) OR TITLE-ABS-KEY (HBV) or TITLE-ABS-KEY (HBsAg) or TITLE-ABS-KEY (HCV) or TITLE-ABS-KEY (anti-HCV) or TITLE-ABS-KEY (HCV antibody) or TITLE-ABS-KEY (core HCV antigen) or TITLE-ABS-KEY (HCVcAg) or TITLE-ABS-KEY (HCV RNA) or TITLE-ABS-KEY (HDV) or TITLE-ABS-KEY (anti-HD) or TITLE-ABS-KEY (anti-HDV) or TITLE-ABS-KEY (HDV IgG)) |
