# Supplementary material for: Epidemiology of hepatitis B, C and D in Malawi: systematic review
Source: Springer Nature journal article supplement (doi:10.1186/s12879-018-3428-7), 2018-10-12
Supplement: MOESM2 [file 16195128]

**SUPPLEMENTARY TABLE 2: Assessment of quality of included studies**

|                    | Was the sample representative of the target population | Were study participants recruited in an appropriate way? | Was the sample size adequate? | Were the study subjects and setting described in detail? | Was the data analysis conducted with sufficient coverage of the identified sample? | Were valid methods used for the identification of the condition? | Was the condition measured in a standard, reliable way for all participants? | Was the response rate adequate, and if not, was the low response rate managed appropriately? |
|--------------------|--------------------------------------------------------|----------------------------------------------------------|-------------------------------|----------------------------------------------------------|------------------------------------------------------------------------------------|------------------------------------------------------------------|------------------------------------------------------------------------------|----------------------------------------------------------------------------------------------|
| Ahmed, 1998        | Y                                                      | Y                                                        | Y                             | Y                                                        | Y                                                                                  | Y                                                                | Y                                                                            | Y                                                                                            |
| Andreotti, 2014    | Y                                                      | Y                                                        | Y                             | Y                                                        | Y                                                                                  | Y                                                                | Y                                                                            | U                                                                                            |
| Aoudjane, 2014     | Y                                                      | Y                                                        | Y                             | Y                                                        | Y                                                                                  | Y                                                                | Y                                                                            | U                                                                                            |
| Candotti, 2001     | N                                                      | U                                                        | N                             | N                                                        | U                                                                                  | Y                                                                | Y                                                                            | U                                                                                            |
| Chasela, 2014      | Y                                                      | Y                                                        | Y                             | Y                                                        | Y                                                                                  | Y                                                                | Y                                                                            | Y                                                                                            |
| Chimphambano, 2007 | N                                                      | Y                                                        | Y                             | Y                                                        | U                                                                                  | Y                                                                | Y                                                                            | U                                                                                            |
| Chipetah, 2017     | N                                                      | Y                                                        | Y                             | Y                                                        | Y                                                                                  | Y                                                                | Y                                                                            | Y                                                                                            |
| Demir, 2016        | Y                                                      | Y                                                        | Y                             | Y                                                        | Y                                                                                  | Y                                                                | Y                                                                            | Y                                                                                            |
| Fox, 2015          | N                                                      | Y                                                        | Y                             | Y                                                        | U                                                                                  | Y                                                                | Y                                                                            | U                                                                                            |
| Greer, 2017        | Y                                                      | Y                                                        | Y                             | Y                                                        | Y                                                                                  | Y                                                                | Y                                                                            | Y                                                                                            |
| Loarec 2017        | Y                                                      | U                                                        | Y                             | Y                                                        | U                                                                                  | Y                                                                | Y                                                                            | U                                                                                            |
| Maida, 2000        | N                                                      | Y                                                        | N                             | Y                                                        | U                                                                                  | Y                                                                | Y                                                                            | U                                                                                            |
| Moore, 2010        | U                                                      | Y                                                        | Y                             | Y                                                        | Y                                                                                  | Y                                                                | Y                                                                            | Y                                                                                            |
| Nyirenda, 2008     | N                                                      | Y                                                        | N                             | Y                                                        | U                                                                                  | Y                                                                | Y                                                                            | U                                                                                            |
| Stockdale, 2017    | Y                                                      | Y                                                        | Y                             | N                                                        | Y                                                                                  | Y                                                                | Y                                                                            | U                                                                                            |
| Sutcliffe, 2002    | N                                                      | U                                                        | Y                             | Y                                                        | U                                                                                  | Y                                                                | Y                                                                            | U                                                                                            |
| Taha, 2015         | Y                                                      | Y                                                        | N                             | N                                                        | U                                                                                  | Y                                                                | Y                                                                            | U                                                                                            |
| Varo, 2016         | Y                                                      | Y                                                        | U                             | Y                                                        | U                                                                                  | Y                                                                | Y                                                                            | U                                                                                            |

**Abbreviations:** Y Yes; N No; U Unclear
